# Supplementary material for: Is quality affordable for community health systems? Costs of integrating quality improvement into close-to-community health programmes in five low-income and middle-income countries
Source: PubMed Central journal article supplement — BMJ Glob Health. 2019 Jul 8;4(4):e001390. doi: 10.1136/bmjgh-2019-001390 (PMC6626522; doi:10.1136/bmjgh-2019-001390), 2019-07-08
Supplement: bmjgh-2019-001390supp001.pdf [file bmjgh-2019-001390supp001.pdf]

Kumar, M et al.

**Supplementary File 1:** Key differences and similarities in CHW programme design features in 2015 in Ethiopia, Indonesia, Kenya, Malawi, Mozambique

| Design Feature                     | Ethiopia                                                                                                                                                                                                                                                                                                                    |                                                          | Kenya                                                                                           |                               | Malawi                                                                                                                                   |                        | Mozambique                                                            | Indonesia                                                                                        |                                                                               |                                                                              |
|------------------------------------|-----------------------------------------------------------------------------------------------------------------------------------------------------------------------------------------------------------------------------------------------------------------------------------------------------------------------------|----------------------------------------------------------|-------------------------------------------------------------------------------------------------|-------------------------------|------------------------------------------------------------------------------------------------------------------------------------------|------------------------|-----------------------------------------------------------------------|--------------------------------------------------------------------------------------------------|-------------------------------------------------------------------------------|------------------------------------------------------------------------------|
| <b>General features</b>            |                                                                                                                                                                                                                                                                                                                             |                                                          |                                                                                                 |                               |                                                                                                                                          |                        |                                                                       |                                                                                                  |                                                                               |                                                                              |
| <b>Programme start</b>             | 2004                                                                                                                                                                                                                                                                                                                        | 2011                                                     | 2006                                                                                            | 2006                          | 1992                                                                                                                                     |                        | 1978; Revitalised 2010                                                | 1989 for village midwife (VMW), 1985 for kader, late 1960s for traditional birth attendant (TBA) |                                                                               |                                                                              |
| <b>Name of CTC provider</b>        | Health Extension Worker (HEW)                                                                                                                                                                                                                                                                                               | Health development army (HDA) leader                     | Community Health Extension Worker (CHEW)                                                        | Community Health Worker (CHW) | Health Surveillance Assistant (HSA)                                                                                                      | Volunteer              | <i>Agente Polivalente Elementar</i> (APE)                             | Village midwives                                                                                 | <i>Posyandu kaders</i> (Community Health Volunteer)                           | Traditional Birth Attendant (TBA)                                            |
| <b>Standing category</b>           | General CHW                                                                                                                                                                                                                                                                                                                 | Advocate or instructor                                   | General CHW                                                                                     | General CHW                   | General CHW                                                                                                                              | Advocate or instructor | General CHW                                                           | Formal health provider                                                                           | General CHW                                                                   | Specialised CHW                                                              |
| <b>Employment status (Gov/NGO)</b> | Monthly, paid by the government                                                                                                                                                                                                                                                                                             | Volunteer                                                | Government                                                                                      | Government/NGO                | Government                                                                                                                               | NGO                    |                                                                       | Government                                                                                       | Community-based (community volunteer)                                         | Self-employed                                                                |
| <b>Programme focus area</b>        | Four major components, including 16 packages: disease prevention and control (HIV/AIDS, tuberculosis, malaria, first aid); family health (maternal and child health, family planning, immunization, nutrition, adolescent health); hygiene and environmental sanitation (excreta disposal, solid and liquid waste disposal, | Sensitization and community mobilization on HEP packages | Disease prevention and control, family health services and hygiene and environmental sanitation |                               | Community health, family health, environmental health, prevention and control of communicable diseases and management and administration |                        | Child health, diagnose and treat malaria, diarrhoea, chest infections | Maternal health: delivery care, antenatal and postnatal care                                     | Weighing of infants, health promotion: nutrition advice and diarrhoea control | Previously, assisting in home deliveries. Now: partner with village midwives |

Kumar, M et al.

**Supplementary File 1:** Key differences and similarities in CHW programme design features in 2015 in Ethiopia, Indonesia, Kenya, Malawi, Mozambique

| Design Feature                | Ethiopia                                                                                                                                                                            |                                                                                               | Kenya                                                     |                                                                                   | Malawi           |                                                                                              | Mozambique      | Indonesia                                                                              |                                                                                                                                                                                                                                  |                                                              |
|-------------------------------|-------------------------------------------------------------------------------------------------------------------------------------------------------------------------------------|-----------------------------------------------------------------------------------------------|-----------------------------------------------------------|-----------------------------------------------------------------------------------|------------------|----------------------------------------------------------------------------------------------|-----------------|----------------------------------------------------------------------------------------|----------------------------------------------------------------------------------------------------------------------------------------------------------------------------------------------------------------------------------|--------------------------------------------------------------|
|                               | water supply and safety measures, food hygiene and safety measures, healthy home environment, control of insects and rodents, personal hygiene); health education and communication |                                                                                               |                                                           |                                                                                   |                  |                                                                                              |                 |                                                                                        |                                                                                                                                                                                                                                  |                                                              |
| <b>Working hours per week</b> | 40 hours                                                                                                                                                                            | Not specified                                                                                 | Full time government employee; 8 hours/day, 5 days a week | Not specified; however, each CHV should visit all households allocated in a month | 40hours          | 15-20hours a week (varied depending on the nature of the assignment given by different NGOs) |                 | Officially, 10-12 hours but, they have to stand by at the village for 24 hours per day | Approx. 6 hours per month (3 – 4 hours during in the Posyandu services and 2-3 hours doing home visit).<br><br>Working hours are expanded when there are national programmes like vitamin A, national immunisation program, etc. | 24 hours uncertain                                           |
| <b>Catchment area covered</b> | Every Health Post has two HEWs, serving average population of 5,000                                                                                                                 | 30 and 5 households for health development team and one to five network leaders' respectively | 5,000 population                                          | 20 households (or 100 population)                                                 | 1,000 population | Variable but often not determined                                                            | 2500 households | 1- 3 villages 500-15006500 people                                                      | 1 'RT' or second tier of the village                                                                                                                                                                                             | 1 village across villages and even sub-district and district |
| <b>M&amp;E activities</b>     | Monitor the leaders' of                                                                                                                                                             | No                                                                                            | MoH tools: CHEW                                           | MoH tools; Referral register                                                      | YES              | NO                                                                                           |                 | VMW report their activities                                                            | Kader report their activities                                                                                                                                                                                                    | Not available                                                |

Kumar, M et al.

**Supplementary File 1: Key differences and similarities in CHW programme design features in 2015 in Ethiopia, Indonesia, Kenya, Malawi, Mozambique**

| Design Feature                         | Ethiopia                                                                                                                                         |                                                                                                                                   | Kenya                                                                                                                                            |                                                                                                                                                                      | Malawi                                                                                               |                                                                                             | Mozambique                                                                                                                                                                                                                                                                                                                                                                          | Indonesia                                                     |                                                                                             |                        |
|----------------------------------------|--------------------------------------------------------------------------------------------------------------------------------------------------|-----------------------------------------------------------------------------------------------------------------------------------|--------------------------------------------------------------------------------------------------------------------------------------------------|----------------------------------------------------------------------------------------------------------------------------------------------------------------------|------------------------------------------------------------------------------------------------------|---------------------------------------------------------------------------------------------|-------------------------------------------------------------------------------------------------------------------------------------------------------------------------------------------------------------------------------------------------------------------------------------------------------------------------------------------------------------------------------------|---------------------------------------------------------------|---------------------------------------------------------------------------------------------|------------------------|
|                                        | HDA's and one to five network                                                                                                                    |                                                                                                                                   | summary (MoH 515), supervision of CHVs, Household Register summary                                                                               | (MoH 100), Service Delivery Log book (MoH 514), Household register (MoH 513)                                                                                         |                                                                                                      |                                                                                             |                                                                                                                                                                                                                                                                                                                                                                                     | to the DHO through midwife coordinator and head of Puskesmas. | to the village midwives, to the 'kader Posyandu forum' and to the village head/head of PKK. |                        |
| <b>Health service responsibilities</b> | Curative, promotive and preventive services                                                                                                      | Advocacy and sensitisation                                                                                                        | Curative, promotive and preventive services. Six age cohorts – includes pregnant women                                                           | Mobilisation, referral, follow up, basic treatment                                                                                                                   | Essential health package, curative and preventive services, supervision of village health committees | Information, Education and Communication, growth monitoring, referrals to health facilities | Promotive and preventive services, limited curative services (80% and 20% respectively)                                                                                                                                                                                                                                                                                             | Antenatal care, point of care tests, postnatal care           | Mobilisation and support                                                                    | Partner with midwives  |
| <b>Selection and recruitment</b>       |                                                                                                                                                  |                                                                                                                                   |                                                                                                                                                  |                                                                                                                                                                      |                                                                                                      |                                                                                             |                                                                                                                                                                                                                                                                                                                                                                                     |                                                               |                                                                                             |                        |
| <b>Gender</b>                          | Female                                                                                                                                           | Female and male                                                                                                                   | Male and female                                                                                                                                  | Male and female                                                                                                                                                      | Male and female                                                                                      | Male and female                                                                             | Male and female (71% male)                                                                                                                                                                                                                                                                                                                                                          | Female                                                        | Majority female                                                                             | Majority Female        |
| <b>Selection criteria</b>              | Residence in the village, capacity to speak local language, completed 10th grade, and willingness to remain in the village and serve communities | Belonging to a model family, be able role model to others, having the trust of members, and being able to mobilize the community. | A certificate in one of the following areas: Community Health, Sociology, Nutrition, Psychology, Counselling, Social Work, Community Development | Respected and literate community resident, approachable and able to motivate others, good example in health and development, and willing to volunteer for five years | At least completed primary school, preferably secondary school                                       | Willingness to volunteer                                                                    | Being aged 18 or over, being a resident and active member of the community and well respected by fellow community members, having minimal literacy (able to read and write in Portuguese) and numeracy (able to perform basic arithmetic calculations). Preference was given to women candidates (although in practice more men are selected for reasons yet to be better studied). | Trained Midwives                                              | Willingness to volunteer, literate                                                          | Traditionally in place |
| <b>Recruitment process</b>             | Selection is done by a committee comprising members nominated by                                                                                 | Leaders of the health development teams and the one-to-five networks are                                                          | Trained health professionals                                                                                                                     | Committed local residents                                                                                                                                            | Interviewed and recruited by government health system                                                | Community selection process                                                                 | Community selection process                                                                                                                                                                                                                                                                                                                                                         | Civil service scheme and 'PTT' scheme                         | Selection by the community, mostly elders/ head of village/head of community.               | NA                     |

Kumar, M et al.

**Supplementary File 1:** Key differences and similarities in CHW programme design features in 2015 in Ethiopia, Indonesia, Kenya, Malawi, Mozambique

| Design Feature                      | Ethiopia                                                                                                                                                |                                                                                | Kenya                                                        |                                                              | Malawi                                                                             |                                          | Mozambique                                                                                                                              |                                                                              | Indonesia                                                                                                                             |                               |
|-------------------------------------|---------------------------------------------------------------------------------------------------------------------------------------------------------|--------------------------------------------------------------------------------|--------------------------------------------------------------|--------------------------------------------------------------|------------------------------------------------------------------------------------|------------------------------------------|-----------------------------------------------------------------------------------------------------------------------------------------|------------------------------------------------------------------------------|---------------------------------------------------------------------------------------------------------------------------------------|-------------------------------|
|                                     | the local community and representatives from the woreda (district) health office, the woreda capacity-building office, and the woreda education office. | selected by their team members supported by the HEWs and kebele administration |                                                              |                                                              |                                                                                    |                                          |                                                                                                                                         |                                                                              | Increasing involvement of village midwives in selection process.                                                                      |                               |
| <b>Training and supervision</b>     |                                                                                                                                                         |                                                                                |                                                              |                                                              |                                                                                    |                                          |                                                                                                                                         |                                                                              |                                                                                                                                       |                               |
| <b>Supervision responsibilities</b> | Supervise leaders' of HDA and one to five network                                                                                                       | No                                                                             | Oversight of CHWs                                            | No                                                           | Oversight of volunteers                                                            | No                                       | No                                                                                                                                      | Oversight of volunteers                                                      | No                                                                                                                                    | No                            |
| <b>Initial training</b>             | 1 year                                                                                                                                                  | Few days                                                                       | Full professional training                                   | 10 days training                                             | 12 weeks training                                                                  | None, ad hoc for campaigns or activities | Four months residential training                                                                                                        | Nursing academy 3 years                                                      | None                                                                                                                                  | Non-formal; through mentoring |
| <b>Additional training</b>          | On-job training related to local interventions<br><br>Upgrading to diploma level education                                                              | HEWs' packages focused updates                                                 | Five days training of trainers                               | Quarterly refresher updates                                  | Ad hoc for campaigns of NGO activities                                             | Ad hoc for campaigns of NGO activities   | Ad hoc refreshers                                                                                                                       | In service training offered                                                  | On the job. Learning by doing                                                                                                         | Through mentoring             |
| <b>Supervision structure</b>        | Supervised by supervisors from the Health Centre and <i>woreda</i> health office weekly and monthly respectively                                        | Informal and irregular, by HEWs                                                | Supervised by district focal person; at least once per month | Supervised by CHEWs in a 1-25 ratio; at least once per month | Supervised by Environmental Health Officers and Community Nurses Monthly/quarterly | Ad hoc by HSAs                           | Supervised by facility-based health care workers (monthly) and district (quarterly) and provincial supervisors (6 month). But irregular | Formally supervised by midwife coordinator at PHC<br>Frequency: once a month | None by the head of village/head of PKK (once a month) and village midwife (after Posyandu service, but not applied in all Posyandu). | None                          |
| <b>Remuneration and supplies</b>    |                                                                                                                                                         |                                                                                |                                                              |                                                              |                                                                                    |                                          |                                                                                                                                         |                                                                              |                                                                                                                                       |                               |

Kumar, M et al.

**Supplementary File 1:** Key differences and similarities in CHW programme design features in 2015 in Ethiopia, Indonesia, Kenya, Malawi, Mozambique

| Design Feature                       | Ethiopia                                                                                                                                                                       |                                                    | Kenya                                           |                                         | Malawi                                                                                                                      |                                              | Mozambique                                                                                          | Indonesia                                                                                                                                           |                                                                                                            |                                                             |
|--------------------------------------|--------------------------------------------------------------------------------------------------------------------------------------------------------------------------------|----------------------------------------------------|-------------------------------------------------|-----------------------------------------|-----------------------------------------------------------------------------------------------------------------------------|----------------------------------------------|-----------------------------------------------------------------------------------------------------|-----------------------------------------------------------------------------------------------------------------------------------------------------|------------------------------------------------------------------------------------------------------------|-------------------------------------------------------------|
|                                      | Yes                                                                                                                                                                            | No                                                 | Yes                                             | No                                      | Yes                                                                                                                         | No                                           | Yes (described as an allowance or subsidy)                                                          | Yes                                                                                                                                                 | No                                                                                                         | No                                                          |
| <b>Incentives from health system</b> | Some programmes give airtime, allowance during in-service training<br><br>Ad hoc best performance award from regional health bureau or ministry of health during HEWs festival | Ad hoc per diem when campaigns are conducted       | Some programmes give airtime, motorbikes, bikes | Non-monetary e.g. bicycles, badges etc. | Some programmes give bikes, t-shirts, airtime                                                                               | Some programmes give t-shirts or other goods | Uniforms, flashlight, backpack. Some programmes (from NGO) give airtime, bikes.                     | Transport; incentive per antenatal care, delivery assisted and postnatal care, from national insurance scheme, district and region insurance scheme | Allowance varying from 5-20 Euros per month. Incentives from various government and NGO health programmes. | Gifts in kind, incentives for referral to facility delivery |
| <b>Supplies</b>                      | Basic Kit                                                                                                                                                                      | Information, Education and Communication materials | Custodians of the kit                           | Basic kit                               | Uniform, weighing scale, Information, Education and Communication materials and others depending on district/ NGOs involved | None                                         | Custodians of the kit that includes gloves, bandages, antibiotics, ORS, malaria tests and treatment | Midwifery kit, tests, training                                                                                                                      | Uniform, Information, Education (training) and Communication materials                                     | Previously: delivery kit<br>Now: None                       |
