# Supplementary material for: Is quality affordable for community health systems? Costs of integrating quality improvement into close-to-community health programmes in five low-income and middle-income countries
Source: PubMed Central journal article supplement — BMJ Glob Health. 2019 Jul 8;4(4):e001390. doi: 10.1136/bmjgh-2019-001390 (PMC6626522; doi:10.1136/bmjgh-2019-001390), 2019-07-08
Supplement: bmjgh-2019-001390supp002.pdf [file bmjgh-2019-001390supp002.pdf]

Kumar, M et al.

Supplementary File 2: Costing adjustments made in calculating country costs

Details of specific cost adjustments made at each of the steps of the intervention when calculating country costs. **NB Country costs cannot be added together to get a total project cost.**

These are detailed below by step of the intervention, as described in Figure 1 of the main paper.

| Step # | Adjustment                                                                                                                                                                                                                                                                                                                                                                                                                       |
|--------|----------------------------------------------------------------------------------------------------------------------------------------------------------------------------------------------------------------------------------------------------------------------------------------------------------------------------------------------------------------------------------------------------------------------------------|
| 1.     | The curriculum development costs have been included in each of the country costings, though they were only incurred once.                                                                                                                                                                                                                                                                                                        |
| 2.     | In order to achieve comparability between countries, in addition to the two international quality improvement expert trainers we have costed the participation of the minimum required country team: one senior researcher, one junior researcher, and one policymaker at the local rate for each country in the reference case. The venue cost used was a domestic venue relevant for each country, as identified by the teams. |
| 3.     | The country adaptation included the adaptation of materials internally to the trainer team as well as external alignment meetings where needed. Also, where relevant this included sensitisation of senior Ministry of Health officials on the approach through local meetings.                                                                                                                                                  |
| 4.     | Where applicable, costs associated with selection of participants for the training have also been included here along with actual training costs.                                                                                                                                                                                                                                                                                |
| 5.     | Regardless of the actual meeting frequency when implemented by country QI teams, we have costed a quarterly meeting frequency for comparability.                                                                                                                                                                                                                                                                                 |
| 6.     | The QI interventions designed by the teams will generate economic costs and <i>may</i> generate financial costs. For 'resulting interventions', annualized costs were calculated based on the first resulting intervention attempted by each QI team, and assumes a functional QI team will implement two such interventions annually in the reference case.                                                                     |
