# Supplementary material for: Is quality affordable for community health systems? Costs of integrating quality improvement into close-to-community health programmes in five low-income and middle-income countries
Source: PubMed Central journal article supplement — BMJ Glob Health. 2019 Jul 8;4(4):e001390. doi: 10.1136/bmjgh-2019-001390 (PMC6626522; doi:10.1136/bmjgh-2019-001390), 2019-07-08
Supplement: bmjgh-2019-001390supp003.pdf [file bmjgh-2019-001390supp003.pdf]

MKumar et al.

Supplementary material 3: Country costing tool, part 1

**To be filled out by each country's REACHOUT research team**

A. Summary of the major steps of quality improvement (QI) intervention:

Check these inter-country steps and contextualize based on what you actually did as a country team. Is anything major missing? If so, add it in the list below and in the table in part B as a new line.

1. Training of trainers on QI
2. Adapt QI training material for your country
3. Identify QI teams
4. Training QI teams
5. Ongoing QI team meetings
6. QI team interventions

B. Activities that make up the steps

There are smaller activities that make up each of those big steps listed in Part A.

For example, there might be a sensitisation meeting required before nominating a QI team or liaising with potential attendees to fix a meeting time.

For each major step, try to include all the activities and quantify the resources that made it happen – the information in step 1 is provided as an example.

**NB – you do not need to know the prices/costs of the consumables at this point!**

|                                           | Venue<br>(name and # of<br>days)    | People (#,<br>role/title/grade,<br>days)                                                          | Consumables (e.g.<br>stationery,<br>printing, food)                                       | Transportation<br>(vehicle type,<br>distance –<br>where<br>possible) |
|-------------------------------------------|-------------------------------------|---------------------------------------------------------------------------------------------------|-------------------------------------------------------------------------------------------|----------------------------------------------------------------------|
| <b>STEP 1: Training of trainers on QI</b> |                                     |                                                                                                   |                                                                                           |                                                                      |
| 1-0: ID and<br>confirm<br>facilitators    | LSTM office (no<br>rental required) | 1 senior PI – 0<br>days<br>1 consultant - .5<br>days<br>1 admin asst –<br>0.5 days                |                                                                                           |                                                                      |
| 1-1: Design<br>curriculum                 | LSTM office (no<br>rental required) | 1 senior PI – 10<br>days<br>1 consultant –<br>10 days<br>3 senior<br>researchers – 2<br>days each | 6 pads of sticky<br>notes<br>2 white boards<br>500 pages of<br>printing<br>3 ring binders |                                                                      |
| 1-2: Travel to<br>ToT venue               |                                     | All REACHOUT<br>researchers<br>2 trainers<br>3 policymakers                                       |                                                                                           | Flights to<br>Jakarta<br>Charter bus                                 |

MKumar et al.

## Supplementary material 3: Country costing tool, part 1

|                                                                                                                                                                 |                           |                                                             |                                                                         |  |
|-----------------------------------------------------------------------------------------------------------------------------------------------------------------|---------------------------|-------------------------------------------------------------|-------------------------------------------------------------------------|--|
| 1-3: Training of trainers                                                                                                                                       | Indonesia hotel<br>3 days | All REACHOUT<br>researchers<br>2 trainers<br>3 policymakers | 300 pages<br>printing<br>Notebooks and<br>pens<br>Conference<br>package |  |
| <b>STEP 2: Adapt country QI curriculum</b>                                                                                                                      |                           |                                                             |                                                                         |  |
| 2-1:                                                                                                                                                            |                           |                                                             |                                                                         |  |
|                                                                                                                                                                 |                           |                                                             |                                                                         |  |
| <b>STEP 3: Nominate/select QI teams</b>                                                                                                                         |                           |                                                             |                                                                         |  |
|                                                                                                                                                                 |                           |                                                             |                                                                         |  |
| <b>STEP 4: QI trainings</b>                                                                                                                                     |                           |                                                             |                                                                         |  |
| Phase 1                                                                                                                                                         |                           |                                                             |                                                                         |  |
| Phase 2                                                                                                                                                         |                           |                                                             |                                                                         |  |
| Phase 3                                                                                                                                                         |                           |                                                             |                                                                         |  |
| <b>STEP 5: QI team meetings</b> (Describe what would be required for a single meeting in the steps below and list the frequency (weekly/monthly/quarterly/etc): |                           |                                                             |                                                                         |  |
|                                                                                                                                                                 |                           |                                                             |                                                                         |  |
|                                                                                                                                                                 |                           |                                                             |                                                                         |  |
|                                                                                                                                                                 |                           |                                                             |                                                                         |  |
| <b>STEP 6: QI intervention</b>                                                                                                                                  |                           |                                                             |                                                                         |  |
|                                                                                                                                                                 |                           |                                                             |                                                                         |  |
|                                                                                                                                                                 |                           |                                                             |                                                                         |  |
|                                                                                                                                                                 |                           |                                                             |                                                                         |  |

What I'll do next: restructure then information you sent into Excel and send it back with you to discuss with your finance person (probably will require about 2 hours) to fill in the details!

This will be followed by a workshop in the Nairobi consortium meeting for further discussion of the differences between countries.
