# Supplementary material for: Is quality affordable for community health systems? Costs of integrating quality improvement into close-to-community health programmes in five low-income and middle-income countries
Source: PubMed Central journal article supplement — BMJ Glob Health. 2019 Jul 8;4(4):e001390. doi: 10.1136/bmjgh-2019-001390 (PMC6626522; doi:10.1136/bmjgh-2019-001390), 2019-07-08
Supplement: bmjgh-2019-001390supp004.pdf [file bmjgh-2019-001390supp004.pdf]

| item                                                                              | # of units | unit cost | subtotal | Activity cost |
|-----------------------------------------------------------------------------------|------------|-----------|----------|---------------|
| <b>Step 1: Development of global quality improvement curriculum</b>               |            |           |          |               |
| Curriculum development materials                                                  |            |           | 0        |               |
| International QI experts                                                          |            |           | 0        |               |
| Venue                                                                             |            |           | 0        | 0             |
| <b>Step 2: Training of program trainers (ToT) on quality improvement</b>          |            |           |          |               |
| Venue                                                                             |            |           | 0        |               |
| Conference package                                                                |            |           | 0        |               |
| Senior researcher                                                                 |            |           | 0        |               |
| Junior researcher                                                                 |            |           | 0        |               |
| Policymaker                                                                       |            |           | 0        |               |
| International QI expert trainers                                                  |            |           | 0        |               |
| USB                                                                               |            |           | 0        | 0             |
| <b>Step 3a: Adaptation - Sensitisation of National and County MoH teams on QI</b> |            |           |          |               |
|                                                                                   |            |           |          | 0             |
| Sensitisation of national MoH team on QI                                          |            |           | 0        |               |
|                                                                                   |            |           | 0        |               |
|                                                                                   |            |           | 0        |               |
|                                                                                   |            |           | 0        |               |
|                                                                                   |            |           | 0        | 0             |
| Sensitisation of county MoH team on QI                                            |            |           | 0        |               |
|                                                                                   |            |           | 0        |               |
|                                                                                   |            |           | 0        |               |
|                                                                                   |            |           | 0        |               |
|                                                                                   |            |           | 0        | 0             |
| Sensitisation of sub-county HMT team on QI                                        |            |           | 0        |               |
|                                                                                   |            |           | 0        |               |
|                                                                                   |            |           | 0        |               |
|                                                                                   |            |           | 0        |               |
|                                                                                   |            |           | 0        | 0             |
| <b>Step 3b: Adaptation of QI curriculum to country context</b>                    |            |           |          |               |
|                                                                                   |            |           |          | 0             |
| National MoH meetings to discuss content                                          |            |           | 0        |               |
|                                                                                   |            |           | 0        |               |
|                                                                                   |            |           | 0        |               |
|                                                                                   |            |           | 0        |               |
|                                                                                   |            |           | 0        | 0             |
| National MoH workshops to draft QI curriculum                                     |            |           | 0        |               |
|                                                                                   |            |           | 0        |               |
|                                                                                   |            |           | 0        |               |
|                                                                                   |            |           | 0        |               |
|                                                                                   |            |           | 0        | 0             |
| Internal meetings to draft content                                                |            |           | 0        |               |
|                                                                                   |            |           | 0        |               |
|                                                                                   |            |           | 0        | 0             |
| Skype calls to discuss content                                                    |            |           | 0        |               |
|                                                                                   |            |           | 0        | 0             |
| Internal one week workshop to finalize training content                           |            |           | 0        |               |
|                                                                                   |            |           | 0        |               |
|                                                                                   |            |           | 0        |               |
|                                                                                   |            |           | 0        | 0             |
| <b>Pilot of QI tools</b>                                                          |            |           |          |               |
|                                                                                   |            |           |          | 0             |
| <b>Step 4: Nominate/select QI teams</b>                                           |            |           |          |               |
| Consultation with Sub County Health Management Teams                              |            |           | 0        |               |
|                                                                                   |            |           | 0        |               |
|                                                                                   |            |           | 0        |               |
|                                                                                   |            |           | 0        |               |
|                                                                                   |            |           | 0        | 0             |
| <b>Step 5: QI trainings</b>                                                       |            |           |          |               |
|                                                                                   |            |           |          | 0             |
| Phase 1 training: QI orientation                                                  |            |           | 0        |               |
|                                                                                   |            |           | 0        |               |
|                                                                                   |            |           | 0        |               |
|                                                                                   |            |           | 0        |               |
|                                                                                   |            |           | 0        | 0             |

|                                                                 |  |  |  |   |   |
|-----------------------------------------------------------------|--|--|--|---|---|
| Phase 2 training: capacity building on data analysis            |  |  |  | 0 | 0 |
|                                                                 |  |  |  | 0 |   |
|                                                                 |  |  |  | 0 |   |
|                                                                 |  |  |  | 0 |   |
|                                                                 |  |  |  | 0 |   |
| Phase 3 training: presentation of data and evaluation           |  |  |  | 0 | 0 |
|                                                                 |  |  |  | 0 |   |
|                                                                 |  |  |  | 0 |   |
|                                                                 |  |  |  | 0 |   |
|                                                                 |  |  |  | 0 |   |
| <b>Step 6: QI team meetings</b>                                 |  |  |  |   |   |
| Quarterly QI team meetings (multiplied by 4 to get annual cost) |  |  |  |   | 0 |
|                                                                 |  |  |  |   |   |
|                                                                 |  |  |  |   |   |
|                                                                 |  |  |  |   |   |
| <b>Step 7: QI intervention on data quality</b>                  |  |  |  |   | 0 |
| CHV training on completion of data tools                        |  |  |  | 0 | 0 |
|                                                                 |  |  |  | 0 |   |
|                                                                 |  |  |  | 0 |   |
|                                                                 |  |  |  | 0 |   |
|                                                                 |  |  |  | 0 |   |
|                                                                 |  |  |  | 0 |   |
|                                                                 |  |  |  | 0 |   |
|                                                                 |  |  |  | 0 |   |
|                                                                 |  |  |  | 0 |   |
|                                                                 |  |  |  | 0 |   |
| Provision of MoH data tools                                     |  |  |  |   | 0 |
| Training of QI coaches                                          |  |  |  | 0 | 0 |
|                                                                 |  |  |  | 0 |   |
|                                                                 |  |  |  | 0 |   |
|                                                                 |  |  |  | 0 |   |
|                                                                 |  |  |  | 0 |   |
|                                                                 |  |  |  | 0 |   |
|                                                                 |  |  |  | 0 |   |
|                                                                 |  |  |  | 0 |   |
|                                                                 |  |  |  | 0 |   |
|                                                                 |  |  |  | 0 |   |
| QI coaching by researchers                                      |  |  |  | 0 | 0 |
|                                                                 |  |  |  | 0 |   |
|                                                                 |  |  |  | 0 |   |
|                                                                 |  |  |  | 0 |   |
|                                                                 |  |  |  | 0 |   |
|                                                                 |  |  |  | 0 |   |
|                                                                 |  |  |  | 0 |   |
|                                                                 |  |  |  | 0 |   |
| Supporting QI coaching by MoH officials                         |  |  |  |   | 0 |
