# Supplementary material for: Is quality affordable for community health systems? Costs of integrating quality improvement into close-to-community health programmes in five low-income and middle-income countries
Source: PubMed Central journal article supplement — BMJ Glob Health. 2019 Jul 8;4(4):e001390. doi: 10.1136/bmjgh-2019-001390 (PMC6626522; doi:10.1136/bmjgh-2019-001390), 2019-07-08
Supplement: bmjgh-2019-001390supp005.pdf [file bmjgh-2019-001390supp005.pdf]

Kumar, M et al.

Supplementary File 5: Sensitivity analysis for Ministry of Health-led Quality Improvement

| Intervention step number* and description                | Sensitivity cases                                           |                                                               |                                                                   |
|----------------------------------------------------------|-------------------------------------------------------------|---------------------------------------------------------------|-------------------------------------------------------------------|
|                                                          | Reference case                                              | Active adoption                                               | Poor adoption                                                     |
| <u>Step 4:</u><br>Establishment and training of QI teams | Two public sector trainers<br>One REACHOUT master trainer   | Public sector trainers only                                   | Two REACHOUT master trainers<br>One public sector support trainer |
| <u>Step 5:</u><br>QI team meetings                       | Quarterly meetings<br>Annual supervision by MoH supervisors | Quarterly meetings<br>Biannual supervision by MoH supervisors | Bi-annual meetings<br>No supervision                              |
| <u>Step 6:</u><br>QI team interventions                  | Two interventions per year                                  | Two interventions per year                                    | One intervention per year                                         |

\*refers to steps from the diagram shown in Figure 1 of the main document.
