# Supplementary material for: Is quality affordable for community health systems? Costs of integrating quality improvement into close-to-community health programmes in five low-income and middle-income countries
Source: PubMed Central journal article supplement — BMJ Glob Health. 2019 Jul 8;4(4):e001390. doi: 10.1136/bmjgh-2019-001390 (PMC6626522; doi:10.1136/bmjgh-2019-001390), 2019-07-08
Supplement: bmjgh-2019-001390supp006.pdf [file bmjgh-2019-001390supp006.pdf]

M Kumar et al.

Supplementary file 6: In country ethical review boards and approvals

| <b>Study country</b> | <b>Ethical Review Board</b>                                                        | <b>Protocol Reference Number</b>  |
|----------------------|------------------------------------------------------------------------------------|-----------------------------------|
| Ethiopia             | Southern Nations Nationalities and People's Regional State Health Bureau           | ዘጠፎ 2-8/1754                      |
| Indonesia            | University of Hasanuddin                                                           | 597/H4.8.4.5.31/PP36-KOMETIK/2016 |
| Kenya                | Kenya Medical Research Institute                                                   | KEMRI/RES/7/3/1                   |
| Malawi               | National Health Sciences Research Committee                                        | 1286                              |
| Mozambique           | University of Eduardo Mondlane, Faculty of Medicine and Central Hospital of Maputo | CIBS FM&HCM/45/2014               |
| United Kingdom       | University of Liverpool, Liverpool School of Tropical Medicine                     | 14.007                            |
