# Supplementary material for: Is quality affordable for community health systems? Costs of integrating quality improvement into close-to-community health programmes in five low-income and middle-income countries
Source: PubMed Central journal article supplement — BMJ Glob Health. 2019 Jul 8;4(4):e001390. doi: 10.1136/bmjgh-2019-001390 (PMC6626522; doi:10.1136/bmjgh-2019-001390), 2019-07-08
Supplement: bmjgh-2019-001390supp007.pdf [file bmjgh-2019-001390supp007.pdf]

**ETHIOPIA ECONOMIC**Scenario: **Embedded base case economic costs**

| Item             | Cost per item | Year 1       | Year 2       | Year 3       | Year 4       | Year 5       | Total 5 year costs | Annualized   |
|------------------|---------------|--------------|--------------|--------------|--------------|--------------|--------------------|--------------|
| Training         | \$ 12,326.54  | \$ 3,316.17  | \$ 3,316.17  | \$ 3,316.17  | \$ 3,316.17  | \$ 3,316.17  | \$ 16,580.86       | \$ 3,316.17  |
| QI meetings      | \$ 1,897.42   | \$ 1,897.42  | \$ 1,897.42  | \$ 1,897.42  | \$ 1,897.42  | \$ 1,897.42  | \$ 9,487.12        | \$ 1,897.42  |
| QI interventions | \$ 12,062.24  | \$ 12,062.24 | \$ 12,062.24 | \$ 12,062.24 | \$ 12,062.24 | \$ 12,062.24 | \$ 60,311.21       | \$ 12,062.24 |
| <b>Total</b>     |               |              |              |              |              |              | \$ 86,379.19       | \$ 17,275.84 |

Scenario: **Embedded active case economic costs**

| Item             | Cost per item | Year 1       | Year 2       | Year 3       | Year 4       | Year 5       | Total 5 year costs | Annualized   |
|------------------|---------------|--------------|--------------|--------------|--------------|--------------|--------------------|--------------|
| Training         | \$ 11,839.00  | \$ 3,185.01  | \$ 3,185.01  | \$ 3,185.01  | \$ 3,185.01  | \$ 3,185.01  | \$ 15,925.06       | \$ 3,185.01  |
| QI meetings      | \$ 1,897.42   | \$ 1,897.42  | \$ 1,897.42  | \$ 1,897.42  | \$ 1,897.42  | \$ 1,897.42  | \$ 9,487.12        | \$ 1,897.42  |
| QI interventions | \$ 16,082.99  | \$ 16,082.99 | \$ 16,082.99 | \$ 16,082.99 | \$ 16,082.99 | \$ 16,082.99 | \$ 80,414.94       | \$ 16,082.99 |
| <b>Total</b>     |               |              |              |              |              |              | \$ 105,827.12      | \$ 21,165.42 |

Scenario: **Embedded passive case economic costs**

| Item             | Cost per item | Year 1      | Year 2      | Year 3      | Year 4      | Year 5      | Total 5 year costs | Annualized   |
|------------------|---------------|-------------|-------------|-------------|-------------|-------------|--------------------|--------------|
| Training         | \$ 12,814.07  | \$ 3,447.33 | \$ 3,447.33 | \$ 3,447.33 | \$ 3,447.33 | \$ 3,447.33 | \$ 17,236.66       | \$ 3,447.33  |
| QI meetings      | \$ 948.71     | \$ 948.71   | \$ 948.71   | \$ 948.71   | \$ 948.71   | \$ 948.71   | \$ 4,743.56        | \$ 948.71    |
| QI interventions | \$ 8,440.13   | \$ 8,440.13 | \$ 8,440.13 | \$ 8,440.13 | \$ 8,440.13 | \$ 8,440.13 | \$ 42,200.67       | \$ 8,440.13  |
| <b>Total</b>     |               |             |             |             |             |             | \$ 64,180.89       | \$ 12,836.18 |

**FINANCIAL**Scenario: **Embedded base case financial costs**

| Item             | Cost per item | Year 1      | Year 2      | Year 3      | Year 4      | Year 5      | Total 5 year costs | Average costs |
|------------------|---------------|-------------|-------------|-------------|-------------|-------------|--------------------|---------------|
| Training         | \$ 8,509.25   | \$ 2,289.22 | \$ 2,289.22 | \$ 2,289.22 | \$ 2,289.22 | \$ 2,289.22 | \$ 11,446.09       | \$ 2,289.22   |
| QI meetings      | \$ 539.80     | \$ 539.80   | \$ 539.80   | \$ 539.80   | \$ 539.80   | \$ 539.80   | \$ 2,699.01        | \$ 539.80     |
| QI interventions | \$ 8,495.11   | \$ 8,495.11 | \$ 8,495.11 | \$ 8,495.11 | \$ 8,495.11 | \$ 8,495.11 | \$ 42,475.57       | \$ 8,495.11   |
| <b>Total</b>     |               |             |             |             |             |             | \$ 56,620.66       | \$ 11,324.13  |

Scenario: **Embedded active case financial costs**

| Item             | Cost per item | Year 1       | Year 2       | Year 3       | Year 4       | Year 5       | Total 5 year costs | Average costs |
|------------------|---------------|--------------|--------------|--------------|--------------|--------------|--------------------|---------------|
| Training         | \$ 8,021.71   | \$ 2,158.06  | \$ 2,158.06  | \$ 2,158.06  | \$ 2,158.06  | \$ 2,158.06  | \$ 10,790.29       | \$ 2,158.06   |
| QI meetings      | \$ 539.80     | \$ 539.80    | \$ 539.80    | \$ 539.80    | \$ 539.80    | \$ 539.80    | \$ 2,699.01        | \$ 539.80     |
| QI interventions | \$ 11,326.82  | \$ 11,326.82 | \$ 11,326.82 | \$ 11,326.82 | \$ 11,326.82 | \$ 11,326.82 | \$ 56,634.09       | \$ 11,326.82  |
| <b>Total</b>     |               |              |              |              |              |              | \$ 70,123.38       | \$ 14,024.68  |

Scenario: **Embedded passive case financial costs**

| Item             | Cost per item | Year 1      | Year 2      | Year 3      | Year 4      | Year 5      | Total 5 year costs | Average costs |
|------------------|---------------|-------------|-------------|-------------|-------------|-------------|--------------------|---------------|
| Training         | \$ 8,996.78   | \$ 2,420.38 | \$ 2,420.38 | \$ 2,420.38 | \$ 2,420.38 | \$ 2,420.38 | \$ 12,101.89       | \$ 2,420.38   |
| QI meetings      | \$ 269.90     | \$ 269.90   | \$ 269.90   | \$ 269.90   | \$ 269.90   | \$ 269.90   | \$ 1,349.50        | \$ 269.90     |
| QI interventions | \$ 6,062.05   | \$ 6,062.05 | \$ 6,062.05 | \$ 6,062.05 | \$ 6,062.05 | \$ 6,062.05 | \$ 30,310.24       | \$ 6,062.05   |
| <b>Total</b>     |               |             |             |             |             |             | \$ 43,761.63       | \$ 8,752.33   |

**INDONESIA ECONOMIC**Scenario: **Embedded base case economic costs**

| Item             | Cost per item | Year 1      | Year 2      | Year 3      | Year 4      | Year 5      | Total 5 year costs | Annualized  |
|------------------|---------------|-------------|-------------|-------------|-------------|-------------|--------------------|-------------|
| Training         | \$ 3,371.14   | \$ 906.93   | \$ 906.93   | \$ 906.93   | \$ 906.93   | \$ 906.93   | \$ 4,534.64        | \$ 906.93   |
| QI meetings      | \$ 3,584.55   | \$ 3,584.55 | \$ 3,584.55 | \$ 3,584.55 | \$ 3,584.55 | \$ 3,584.55 | \$ 17,922.77       | \$ 3,584.55 |
| QI interventions | \$ 2,952.26   | \$ 2,952.26 | \$ 2,952.26 | \$ 2,952.26 | \$ 2,952.26 | \$ 2,952.26 | \$ 14,761.29       | \$ 2,952.26 |
| <b>Total</b>     |               |             |             |             |             |             | \$ 37,218.70       | \$ 7,443.74 |

Scenario: **Embedded active case economic costs**

| Item             | Cost per item | Year 1      | Year 2      | Year 3      | Year 4      | Year 5      | Total 5 year costs | Annualized  |
|------------------|---------------|-------------|-------------|-------------|-------------|-------------|--------------------|-------------|
| Training         | \$ 3,312.35   | \$ 891.11   | \$ 891.11   | \$ 891.11   | \$ 891.11   | \$ 891.11   | \$ 4,455.56        | \$ 891.11   |
| QI meetings      | \$ 3,647.27   | \$ 3,647.27 | \$ 3,647.27 | \$ 3,647.27 | \$ 3,647.27 | \$ 3,647.27 | \$ 18,236.34       | \$ 3,647.27 |
| QI interventions | \$ 3,936.34   | \$ 3,936.34 | \$ 3,936.34 | \$ 3,936.34 | \$ 3,936.34 | \$ 3,936.34 | \$ 19,681.72       | \$ 3,936.34 |
| <b>Total</b>     |               |             |             |             |             |             | \$ 42,373.63       | \$ 8,474.73 |

Scenario: **Embedded passive case economic costs**

| Item             | Cost per item | Year 1      | Year 2      | Year 3      | Year 4      | Year 5      | Total 5 year costs | Annualized  |
|------------------|---------------|-------------|-------------|-------------|-------------|-------------|--------------------|-------------|
| Training         | \$ 3,414.93   | \$ 918.71   | \$ 918.71   | \$ 918.71   | \$ 918.71   | \$ 918.71   | \$ 4,593.54        | \$ 918.71   |
| QI meetings      | \$ 948.71     | \$ 948.71   | \$ 948.71   | \$ 948.71   | \$ 948.71   | \$ 948.71   | \$ 4,743.56        | \$ 948.71   |
| QI interventions | \$ 1,968.17   | \$ 1,968.17 | \$ 1,968.17 | \$ 1,968.17 | \$ 1,968.17 | \$ 1,968.17 | \$ 9,840.86        | \$ 1,968.17 |
| <b>Total</b>     |               |             |             |             |             |             | \$ 19,177.97       | \$ 3,835.59 |

**FINANCIAL**Scenario: **Embedded base case financial costs**

| Item             | Cost per item | Year 1    | Year 2    | Year 3    | Year 4    | Year 5    | Total 5 year costs | Average costs |
|------------------|---------------|-----------|-----------|-----------|-----------|-----------|--------------------|---------------|
| Training         | \$ 2,008.98   | \$ 540.47 | \$ 540.47 | \$ 540.47 | \$ 540.47 | \$ 540.47 | \$ 2,702.35        | \$ 540.47     |
| QI meetings      | \$ 59.99      | \$ 59.99  | \$ 59.99  | \$ 59.99  | \$ 59.99  | \$ 59.99  | \$ 299.94          | \$ 59.99      |
| QI interventions | \$ 2.16       | \$ 2.16   | \$ 2.16   | \$ 2.16   | \$ 2.16   | \$ 2.16   | \$ 10.80           | \$ 2.16       |
| <b>Total</b>     |               |           |           |           |           |           | \$ 3,013.08        | \$ 602.62     |

Scenario: **Embedded active case financial costs**

| Item             | Cost per item | Year 1    | Year 2    | Year 3    | Year 4    | Year 5    | Total 5 year costs | Average costs |
|------------------|---------------|-----------|-----------|-----------|-----------|-----------|--------------------|---------------|
| Training         | \$ 1,479.83   | \$ 398.11 | \$ 398.11 | \$ 398.11 | \$ 398.11 | \$ 398.11 | \$ 1,990.57        | \$ 398.11     |
| QI meetings      | \$ 59.99      | \$ 59.99  | \$ 59.99  | \$ 59.99  | \$ 59.99  | \$ 59.99  | \$ 299.94          | \$ 59.99      |
| QI interventions | \$ 2.88       | \$ 2.88   | \$ 2.88   | \$ 2.88   | \$ 2.88   | \$ 2.88   | \$ 14.40           | \$ 2.88       |
| <b>Total</b>     |               |           |           |           |           |           | \$ 2,304.91        | \$ 460.98     |

Scenario: **Embedded passive case financial costs**

| Item             | Cost per item | Year 1    | Year 2    | Year 3    | Year 4    | Year 5    | Total 5 year costs | Average costs |
|------------------|---------------|-----------|-----------|-----------|-----------|-----------|--------------------|---------------|
| Training         | \$ 2,052.77   | \$ 552.25 | \$ 552.25 | \$ 552.25 | \$ 552.25 | \$ 552.25 | \$ 2,761.25        | \$ 552.25     |
| QI meetings      | \$ 29.99      | \$ 29.99  | \$ 29.99  | \$ 29.99  | \$ 29.99  | \$ 29.99  | \$ 149.97          | \$ 29.99      |
| QI interventions | \$ 1.44       | \$ 1.44   | \$ 1.44   | \$ 1.44   | \$ 1.44   | \$ 1.44   | \$ 7.20            | \$ 1.44       |
| <b>Total</b>     |               |           |           |           |           |           | \$ 2,918.42        | \$ 583.68     |

**KENYA ECONOMIC**Scenario: **Embedded base case economic costs**

| Item             | Cost per item | Year 1      | Year 2      | Year 3      | Year 4      | Year 5      | Total 5 year costs | Annualized  |
|------------------|---------------|-------------|-------------|-------------|-------------|-------------|--------------------|-------------|
| Training         | \$ 259,211.01 | \$69,734.77 | \$69,734.77 | \$69,734.77 | \$69,734.77 | \$69,734.77 | \$ 348,673.86      | \$69,734.77 |
| QI meetings      | \$ 17,212.08  | \$17,212.08 | \$17,212.08 | \$17,212.08 | \$17,212.08 | \$17,212.08 | \$ 86,060.41       | \$17,212.08 |
| QI interventions | \$ 15,393.13  | \$15,393.13 | \$15,393.13 | \$15,393.13 | \$15,393.13 | \$15,393.13 | \$ 76,965.64       | \$15,393.13 |
| <b>Total</b>     |               |             |             |             |             |             | \$ 511,699.90      | #####       |

Scenario: **Embedded active case economic costs**

| Item             | Cost per item | Year 1      | Year 2      | Year 3      | Year 4      | Year 5      | Total 5 year costs | Annualized  |
|------------------|---------------|-------------|-------------|-------------|-------------|-------------|--------------------|-------------|
| Training         | \$ 275,324.47 | \$74,069.73 | \$74,069.73 | \$74,069.73 | \$74,069.73 | \$74,069.73 | \$ 370,348.65      | \$74,069.73 |
| QI meetings      | \$ 19,617.58  | \$19,617.58 | \$19,617.58 | \$19,617.58 | \$19,617.58 | \$19,617.58 | \$ 98,087.89       | \$19,617.58 |
| QI interventions | \$ 20,524.17  | \$20,524.17 | \$20,524.17 | \$20,524.17 | \$20,524.17 | \$20,524.17 | \$ 102,620.85      | \$20,524.17 |
| <b>Total</b>     |               |             |             |             |             |             | \$ 571,057.39      | #####       |

Scenario: **Embedded passive case economic costs**

| Item             | Cost per item | Year 1      | Year 2      | Year 3      | Year 4      | Year 5      | Total 5 year costs | Annualized  |
|------------------|---------------|-------------|-------------|-------------|-------------|-------------|--------------------|-------------|
| Training         | \$ 260,755.95 | \$70,150.40 | \$70,150.40 | \$70,150.40 | \$70,150.40 | \$70,150.40 | \$ 350,752.02      | \$70,150.40 |
| QI meetings      | \$ 7,403.29   | \$ 7,403.29 | \$ 7,403.29 | \$ 7,403.29 | \$ 7,403.29 | \$ 7,403.29 | \$ 37,016.46       | \$ 7,403.29 |
| QI interventions | \$ 10,262.09  | \$10,262.09 | \$10,262.09 | \$10,262.09 | \$10,262.09 | \$10,262.09 | \$ 51,310.43       | \$10,262.09 |
| <b>Total</b>     |               |             |             |             |             |             | \$ 439,078.90      | \$87,815.78 |

**FINANCIAL**Scenario: **Embedded base case financial costs**

| Item             | Cost per item | Year 1      | Year 2      | Year 3      | Year 4      | Year 5      | Total 5 year costs | Average costs |
|------------------|---------------|-------------|-------------|-------------|-------------|-------------|--------------------|---------------|
| Training         | \$84,853.87   | \$22,827.99 | \$22,827.99 | \$22,827.99 | \$22,827.99 | \$22,827.99 | \$ 114,139.93      | \$22,827.99   |
| QI meetings      | \$ 6,412.11   | \$ 6,412.11 | \$ 6,412.11 | \$ 6,412.11 | \$ 6,412.11 | \$ 6,412.11 | \$ 32,060.54       | \$ 6,412.11   |
| QI interventions | \$10,526.73   | \$10,526.73 | \$10,526.73 | \$10,526.73 | \$10,526.73 | \$10,526.73 | \$ 52,633.64       | \$10,526.73   |
| <b>Total</b>     |               |             |             |             |             |             | \$ 198,834.12      | \$39,766.82   |

Scenario: **Embedded active case financial costs**

| Item             | Cost per item | Year 1      | Year 2      | Year 3      | Year 4      | Year 5      | Total 5 year costs | Average costs |
|------------------|---------------|-------------|-------------|-------------|-------------|-------------|--------------------|---------------|
| Training         | \$83,667.71   | \$22,508.88 | \$22,508.88 | \$22,508.88 | \$22,508.88 | \$22,508.88 | \$ 112,544.39      | \$22,508.88   |
| QI meetings      | \$ 6,550.02   | \$ 6,550.02 | \$ 6,550.02 | \$ 6,550.02 | \$ 6,550.02 | \$ 6,550.02 | \$ 32,750.11       | \$ 6,550.02   |
| QI interventions | \$11,942.07   | \$11,942.07 | \$11,942.07 | \$11,942.07 | \$11,942.07 | \$11,942.07 | \$ 59,710.35       | \$11,942.07   |
| <b>Total</b>     |               |             |             |             |             |             | \$ 205,004.85      | \$41,000.97   |

Scenario: **Embedded passive case financial costs**

| Item             | Cost per item | Year 1      | Year 2      | Year 3      | Year 4      | Year 5      | Total 5 year costs | Average costs |
|------------------|---------------|-------------|-------------|-------------|-------------|-------------|--------------------|---------------|
| Training         | \$88,040.98   | \$23,685.40 | \$23,685.40 | \$23,685.40 | \$23,685.40 | \$23,685.40 | \$ 118,427.02      | \$23,685.40   |
| QI meetings      | \$ 3,137.10   | \$ 3,137.10 | \$ 3,137.10 | \$ 3,137.10 | \$ 3,137.10 | \$ 3,137.10 | \$ 15,685.49       | \$ 3,137.10   |
| QI interventions | \$ 7,017.82   | \$ 7,017.82 | \$ 7,017.82 | \$ 7,017.82 | \$ 7,017.82 | \$ 7,017.82 | \$ 35,089.10       | \$ 7,017.82   |
| <b>Total</b>     |               |             |             |             |             |             | \$ 169,201.61      | \$33,840.32   |

**MALAWI ECONOMIC**Scenario: **Embedded base case economic costs**

| Item             | Cost per item | Year 1   | Year 2      | Year 3      | Year 4      | Year 5      | Total 5 year costs | Annualized   |              |
|------------------|---------------|----------|-------------|-------------|-------------|-------------|--------------------|--------------|--------------|
| Training         | \$            | 9,210.99 | \$ 2,478.00 | \$ 2,478.00 | \$ 2,478.00 | \$ 2,478.00 | \$ 2,478.00        | \$ 12,390.02 | \$ 2,478.00  |
| QI meetings      | \$            | 2,177.52 | \$ 2,177.52 | \$ 2,177.52 | \$ 2,177.52 | \$ 2,177.52 | \$ 2,177.52        | \$ 10,887.58 | \$ 2,177.52  |
| QI interventions | \$            | 6,754.54 | \$ 6,754.54 | \$ 6,754.54 | \$ 6,754.54 | \$ 6,754.54 | \$ 6,754.54        | \$ 33,772.68 | \$ 6,754.54  |
| <b>Total</b>     |               |          |             |             |             |             |                    | \$ 57,050.28 | \$ 11,410.06 |

Scenario: **Embedded active case economic costs**

| Item             | Cost per item | Year 1   | Year 2      | Year 3      | Year 4      | Year 5      | Total 5 year costs | Annualized   |              |
|------------------|---------------|----------|-------------|-------------|-------------|-------------|--------------------|--------------|--------------|
| Training         | \$            | 8,492.33 | \$ 2,284.67 | \$ 2,284.67 | \$ 2,284.67 | \$ 2,284.67 | \$ 2,284.67        | \$ 11,423.33 | \$ 2,284.67  |
| QI meetings      | \$            | 2,177.52 | \$ 2,177.52 | \$ 2,177.52 | \$ 2,177.52 | \$ 2,177.52 | \$ 2,177.52        | \$ 10,887.58 | \$ 2,177.52  |
| QI interventions | \$            | 9,006.05 | \$ 9,006.05 | \$ 9,006.05 | \$ 9,006.05 | \$ 9,006.05 | \$ 9,006.05        | \$ 45,030.24 | \$ 9,006.05  |
| <b>Total</b>     |               |          |             |             |             |             |                    | \$ 67,341.15 | \$ 13,468.23 |

Scenario: **Embedded passive case economic costs**

| Item             | Cost per item | Year 1   | Year 2      | Year 3      | Year 4      | Year 5      | Total 5 year costs | Annualized   |             |
|------------------|---------------|----------|-------------|-------------|-------------|-------------|--------------------|--------------|-------------|
| Training         | \$            | 9,248.58 | \$ 2,488.12 | \$ 2,488.12 | \$ 2,488.12 | \$ 2,488.12 | \$ 2,488.12        | \$ 12,440.59 | \$ 2,488.12 |
| QI meetings      | \$            | 1,088.76 | \$ 1,088.76 | \$ 1,088.76 | \$ 1,088.76 | \$ 1,088.76 | \$ 1,088.76        | \$ 5,443.79  | \$ 1,088.76 |
| QI interventions | \$            | 4,503.02 | \$ 4,503.02 | \$ 4,503.02 | \$ 4,503.02 | \$ 4,503.02 | \$ 4,503.02        | \$ 22,515.12 | \$ 4,503.02 |
| <b>Total</b>     |               |          |             |             |             |             |                    | \$ 40,399.50 | \$ 8,079.90 |

**FINANCIAL**Scenario: **Embedded base case financial costs**

| Item             | Cost per item | Year 1   | Year 2      | Year 3      | Year 4      | Year 5      | Total 5 year costs | Average costs |             |
|------------------|---------------|----------|-------------|-------------|-------------|-------------|--------------------|---------------|-------------|
| Training         | \$            | 4,878.76 | \$ 1,312.52 | \$ 1,312.52 | \$ 1,312.52 | \$ 1,312.52 | \$ 1,312.52        | \$ 6,562.60   | \$ 1,312.52 |
| QI meetings      | \$            | 1,391.11 | \$ 1,391.11 | \$ 1,391.11 | \$ 1,391.11 | \$ 1,391.11 | \$ 1,391.11        | \$ 6,955.56   | \$ 1,391.11 |
| QI interventions | \$            | 2,925.51 | \$ 2,925.51 | \$ 2,925.51 | \$ 2,925.51 | \$ 2,925.51 | \$ 2,925.51        | \$ 14,627.53  | \$ 2,925.51 |
| <b>Total</b>     |               |          |             |             |             |             |                    | \$ 28,145.69  | \$ 5,629.14 |

Scenario: **Embedded active case financial costs**

| Item             | Cost per item | Year 1   | Year 2      | Year 3      | Year 4      | Year 5      | Total 5 year costs | Average costs |             |
|------------------|---------------|----------|-------------|-------------|-------------|-------------|--------------------|---------------|-------------|
| Training         | \$            | 5,211.81 | \$ 1,402.12 | \$ 1,402.12 | \$ 1,402.12 | \$ 1,402.12 | \$ 1,402.12        | \$ 7,010.59   | \$ 1,402.12 |
| QI meetings      | \$            | 1,391.11 | \$ 1,391.11 | \$ 1,391.11 | \$ 1,391.11 | \$ 1,391.11 | \$ 1,391.11        | \$ 6,955.56   | \$ 1,391.11 |
| QI interventions | \$            | 3,900.67 | \$ 3,900.67 | \$ 3,900.67 | \$ 3,900.67 | \$ 3,900.67 | \$ 3,900.67        | \$ 19,503.37  | \$ 3,900.67 |
| <b>Total</b>     |               |          |             |             |             |             |                    | \$ 33,469.53  | \$ 6,693.91 |

Scenario: **Embedded passive case financial costs**

| Item             | Cost per item | Year 1   | Year 2      | Year 3      | Year 4      | Year 5      | Total 5 year costs | Average costs |             |
|------------------|---------------|----------|-------------|-------------|-------------|-------------|--------------------|---------------|-------------|
| Training         | \$            | 5,743.02 | \$ 1,545.03 | \$ 1,545.03 | \$ 1,545.03 | \$ 1,545.03 | \$ 1,545.03        | \$ 7,725.14   | \$ 1,545.03 |
| QI meetings      | \$            | 695.56   | \$ 695.56   | \$ 695.56   | \$ 695.56   | \$ 695.56   | \$ 695.56          | \$ 3,477.78   | \$ 695.56   |
| QI interventions | \$            | 1,950.34 | \$ 1,950.34 | \$ 1,950.34 | \$ 1,950.34 | \$ 1,950.34 | \$ 1,950.34        | \$ 9,751.69   | \$ 1,950.34 |
| <b>Total</b>     |               |          |             |             |             |             |                    | \$ 20,954.60  | \$ 4,190.92 |

**MOZAMBIQUE ECONOMIC**Scenario: **Embedded base case economic costs**

| Item             | Cost per item | Year 1      | Year 2      | Year 3      | Year 4      | Year 5      | Total 5 year costs | Annualized  |
|------------------|---------------|-------------|-------------|-------------|-------------|-------------|--------------------|-------------|
| Training         | \$ 7,001.19   | \$ 1,883.51 | \$ 1,883.51 | \$ 1,883.51 | \$ 1,883.51 | \$ 1,883.51 | \$ 9,417.54        | \$ 1,883.51 |
| QJ meetings      | \$ 750.26     | \$ 750.26   | \$ 750.26   | \$ 750.26   | \$ 750.26   | \$ 750.26   | \$ 3,751.28        | \$ 750.26   |
| QJ interventions | \$ 1,616.30   | \$ 1,616.30 | \$ 1,616.30 | \$ 1,616.30 | \$ 1,616.30 | \$ 1,616.30 | \$ 8,081.51        | \$ 1,616.30 |
| <b>Total</b>     |               |             |             |             |             |             | \$ 21,250.33       | \$ 4,250.07 |

Scenario: **Embedded active case economic costs**

| Item             | Cost per item | Year 1      | Year 2      | Year 3      | Year 4      | Year 5      | Total 5 year costs | Annualized  |
|------------------|---------------|-------------|-------------|-------------|-------------|-------------|--------------------|-------------|
| Training         | \$ 5,992.04   | \$ 1,612.02 | \$ 1,612.02 | \$ 1,612.02 | \$ 1,612.02 | \$ 1,612.02 | \$ 8,060.11        | \$ 1,612.02 |
| QJ meetings      | \$ 769.08     | \$ 769.08   | \$ 769.08   | \$ 769.08   | \$ 769.08   | \$ 769.08   | \$ 3,845.39        | \$ 769.08   |
| QJ interventions | \$ 2,155.07   | \$ 2,155.07 | \$ 2,155.07 | \$ 2,155.07 | \$ 2,155.07 | \$ 2,155.07 | \$ 10,775.34       | \$ 2,155.07 |
| <b>Total</b>     |               |             |             |             |             |             | \$ 22,680.84       | \$ 4,536.17 |

Scenario: **Embedded passive case economic costs**

| Item             | Cost per item | Year 1      | Year 2      | Year 3      | Year 4      | Year 5      | Total 5 year costs | Annualized  |
|------------------|---------------|-------------|-------------|-------------|-------------|-------------|--------------------|-------------|
| Training         | \$ 7,882.12   | \$ 2,120.50 | \$ 2,120.50 | \$ 2,120.50 | \$ 2,120.50 | \$ 2,120.50 | \$ 10,602.52       | \$ 2,120.50 |
| QJ meetings      | \$ 365.72     | \$ 365.72   | \$ 365.72   | \$ 365.72   | \$ 365.72   | \$ 365.72   | \$ 1,828.58        | \$ 365.72   |
| QJ interventions | \$ 1,077.53   | \$ 1,077.53 | \$ 1,077.53 | \$ 1,077.53 | \$ 1,077.53 | \$ 1,077.53 | \$ 5,387.67        | \$ 1,077.53 |
| <b>Total</b>     |               |             |             |             |             |             | \$ 17,818.77       | \$ 3,563.75 |

**FINANCIAL**Scenario: **Embedded base case financial costs**

| Item             | Cost per item | Year 1      | Year 2      | Year 3      | Year 4      | Year 5      | Total 5 year costs | Average costs |
|------------------|---------------|-------------|-------------|-------------|-------------|-------------|--------------------|---------------|
| Training         | \$ 4,963.79   | \$ 1,335.39 | \$ 1,335.39 | \$ 1,335.39 | \$ 1,335.39 | \$ 1,335.39 | \$ 6,676.97        | \$ 1,335.39   |
| QJ meetings      | \$ 370.99     | \$ 370.99   | \$ 370.99   | \$ 370.99   | \$ 370.99   | \$ 370.99   | \$ 1,854.97        | \$ 370.99     |
| QJ interventions | \$ 217.03     | \$ 217.03   | \$ 217.03   | \$ 217.03   | \$ 217.03   | \$ 217.03   | \$ 1,085.16        | \$ 217.03     |
| <b>Total</b>     |               |             |             |             |             |             | \$ 9,617.10        | \$ 1,923.42   |

Scenario: **Embedded active case financial costs**

| Item             | Cost per item | Year 1      | Year 2      | Year 3      | Year 4      | Year 5      | Total 5 year costs | Average costs |
|------------------|---------------|-------------|-------------|-------------|-------------|-------------|--------------------|---------------|
| Training         | \$ 4,024.75   | \$ 1,082.77 | \$ 1,082.77 | \$ 1,082.77 | \$ 1,082.77 | \$ 1,082.77 | \$ 5,413.84        | \$ 1,082.77   |
| QJ meetings      | \$ 370.99     | \$ 370.99   | \$ 370.99   | \$ 370.99   | \$ 370.99   | \$ 370.99   | \$ 1,854.97        | \$ 370.99     |
| QJ interventions | \$ 289.38     | \$ 289.38   | \$ 289.38   | \$ 289.38   | \$ 289.38   | \$ 289.38   | \$ 1,446.88        | \$ 289.38     |
| <b>Total</b>     |               |             |             |             |             |             | \$ 8,715.69        | \$ 1,743.14   |

Scenario: **Embedded passive case financial costs**

| Item             | Cost per item | Year 1      | Year 2      | Year 3      | Year 4      | Year 5      | Total 5 year costs | Average costs |
|------------------|---------------|-------------|-------------|-------------|-------------|-------------|--------------------|---------------|
| Training         | \$ 6,110.77   | \$ 1,643.96 | \$ 1,643.96 | \$ 1,643.96 | \$ 1,643.96 | \$ 1,643.96 | \$ 8,219.81        | \$ 1,643.96   |
| QJ meetings      | \$ 185.50     | \$ 185.50   | \$ 185.50   | \$ 185.50   | \$ 185.50   | \$ 185.50   | \$ 927.49          | \$ 185.50     |
| QJ interventions | \$ 144.69     | \$ 144.69   | \$ 144.69   | \$ 144.69   | \$ 144.69   | \$ 144.69   | \$ 723.44          | \$ 144.69     |
| <b>Total</b>     |               |             |             |             |             |             | \$ 9,870.73        | \$ 1,974.15   |
